# Supplementary material for: Identification of microRNAs Implicated in Modulating Senecionine-Induced Liver Toxicity in HepaRG Cells
Source: MDPI journal article supplement (doi:10.3390/foods11040532), 2022-02-12
Supplement: s1 [file s1]

## Supplementary Materials

### **Identification of microRNAs Implicated in Modulating Senecionine-Induced Liver Toxicity in HepaRG Cells**

Anne-Margarethe Enge<sup>1</sup>, Heike Sprenger<sup>1</sup>, Albert Braeuning<sup>1</sup>, Stefanie Hessel-Pras<sup>1</sup>

<sup>1</sup> Department of Food Safety, German Federal Institute for Risk Assessment, Max-Dohrn-Str. 8-10, 10589 Berlin, Germany

Corresponding Author:  
Dr. Stefanie Hessel-Pras  
German Federal Institute for Risk Assessment  
Department of Food Safety  
Max-Dohrn-Strasse 8-10  
10589 Berlin  
Germany  
Phone: +49-30-18412-25203  
E-mail: stefanie.hessel-pras@bfr.bund.de

**Table S1:** miRNAs investigated with miRCURY LNA miRNA custom PCR array, including 84 liver-specific miRNAs, 7 housekeeping genes, 1 interplate calibrator, 3 RNA isolation efficiency spike-in controls and 1 reverse transcription efficiency spike-in control.

| no. | miRNA ID        | remark |
|-----|-----------------|--------|
| 1   | hsa-let-7a-5p   |        |
| 2   | hsa-let-7b-5p   |        |
| 3   | hsa-let-7c-5p   |        |
| 4   | hsa-let-7f-5p   |        |
| 5   | hsa-let-7g-5p   |        |
| 6   | hsa-miR-1-3p    |        |
| 7   | hsa-miR-100-5p  |        |
| 8   | hsa-miR-101-3p  |        |
| 9   | hsa-miR-106b-5p |        |
| 10  | hsa-miR-107     |        |
| 11  | hsa-miR-122-5p  |        |
| 12  | hsa-miR-122-3p  |        |
| 13  | hsa-miR-125a-5p |        |
| 14  | hsa-miR-125b-5p |        |
| 15  | hsa-miR-126-5p  |        |
| 16  | hsa-miR-126-3p  |        |
| 17  | hsa-miR-1260a   |        |
| 18  | hsa-miR-142-5p  |        |
| 19  | hsa-miR-142-3p  |        |
| 20  | hsa-miR-143-3p  |        |
| 21  | hsa-miR-145-5p  |        |
| 22  | hsa-miR-145-3p  |        |
| 23  | hsa-miR-146a-5p |        |
| 24  | hsa-miR-148a-3p |        |
| 25  | hsa-miR-148b-3p |        |
| 26  | hsa-miR-155-5p  |        |
| 27  | hsa-miR-15a-5p  |        |
| 28  | hsa-miR-16-5p   |        |
| 29  | hsa-miR-17-5p   |        |
| 30  | hsa-miR-192-5p  |        |
| 31  | hsa-miR-192-3p  |        |

|    |                 |                                          |
|----|-----------------|------------------------------------------|
| 32 | hsa-miR-194-5p  | reverse transcription efficiency control |
| 33 | hsa-miR-195-5p  |                                          |
| 34 | hsa-miR-199a-5p |                                          |
| 35 | UniSp6          |                                          |
| 36 | hsa-miR-199a-3p |                                          |
| 37 | hsa-miR-19a-3p  |                                          |
| 38 | hsa-miR-19b-3p  |                                          |
| 39 | hsa-miR-200b-3p |                                          |
| 40 | hsa-miR-20a-5p  |                                          |
| 41 | hsa-miR-21-5p   |                                          |
| 42 | hsa-miR-214-3p  |                                          |
| 43 | hsa-miR-22-3p   |                                          |
| 44 | hsa-miR-22-5p   |                                          |
| 45 | hsa-miR-221-3p  |                                          |
| 46 | hsa-miR-222-3p  |                                          |
| 47 | hsa-miR-223-3p  |                                          |
| 48 | hsa-miR-224-5p  |                                          |
| 49 | hsa-miR-23a-3p  |                                          |
| 50 | hsa-miR-23b-3p  |                                          |
| 51 | hsa-miR-24-3p   |                                          |
| 52 | hsa-miR-26a-5p  |                                          |
| 53 | hsa-miR-26b-5p  |                                          |
| 54 | hsa-miR-27a-3p  |                                          |
| 55 | hsa-miR-27b-3p  |                                          |
| 56 | hsa-miR-29a-3p  |                                          |
| 57 | hsa-miR-29a-5p  |                                          |
| 58 | hsa-miR-29b-3p  |                                          |
| 59 | hsa-miR-29c-3p  |                                          |
| 60 | hsa-miR-30a-5p  |                                          |
| 61 | hsa-miR-30b-5p  |                                          |
| 62 | hsa-miR-30c-5p  |                                          |
| 63 | hsa-miR-30d-5p  |                                          |
| 64 | hsa-miR-30e-5p  |                                          |
| 65 | hsa-miR-3183    |                                          |

|    |                  |                                    |
|----|------------------|------------------------------------|
| 66 | hsa-miR-34a-5p   |                                    |
| 67 | hsa-miR-34a-3p   |                                    |
| 68 | hsa-miR-3607-5p  |                                    |
| 69 | hsa-miR-3653-3p  |                                    |
| 70 | hsa-miR-3663-3p  |                                    |
| 71 | UniSp3           | inter-plate calibration control    |
| 72 | hsa-miR-375      |                                    |
| 73 | hsa-miR-3907     |                                    |
| 74 | hsa-miR-4286     |                                    |
| 75 | hsa-miR-4291     |                                    |
| 76 | hsa-miR-4301     |                                    |
| 77 | hsa-miR-4454     |                                    |
| 78 | hsa-miR-4516     |                                    |
| 79 | hsa-miR-451a     |                                    |
| 80 | hsa-miR-5100     |                                    |
| 81 | hsa-miR-5701     |                                    |
| 82 | hsa-miR-664b-3p  |                                    |
| 83 | hsa-miR-92a-3p   |                                    |
| 84 | hsa-miR-93-5p    |                                    |
| 85 | hsa-miR-940      |                                    |
| 86 | hsa-miR-99a-5p   |                                    |
| 87 | hsa-miR-103a-3p  | housekeeping gene                  |
| 88 | hsa-miR-16-5p    | housekeeping gene                  |
| 89 | hsa-miR-191-5p   | housekeeping gene                  |
| 90 | hsa-miR-423-5p   | housekeeping gene                  |
| 91 | hsa-miR-23a-3p   | housekeeping gene                  |
| 92 | SNORD38B(hsa)    | housekeeping gene                  |
| 93 | RNU1A1(mmu, hsa) | housekeeping gene                  |
| 94 | UniSp5           | miRNA isolation efficiency control |
| 95 | UniSp4           | miRNA isolation efficiency control |
| 96 | UniSp2           | miRNA isolation efficiency control |

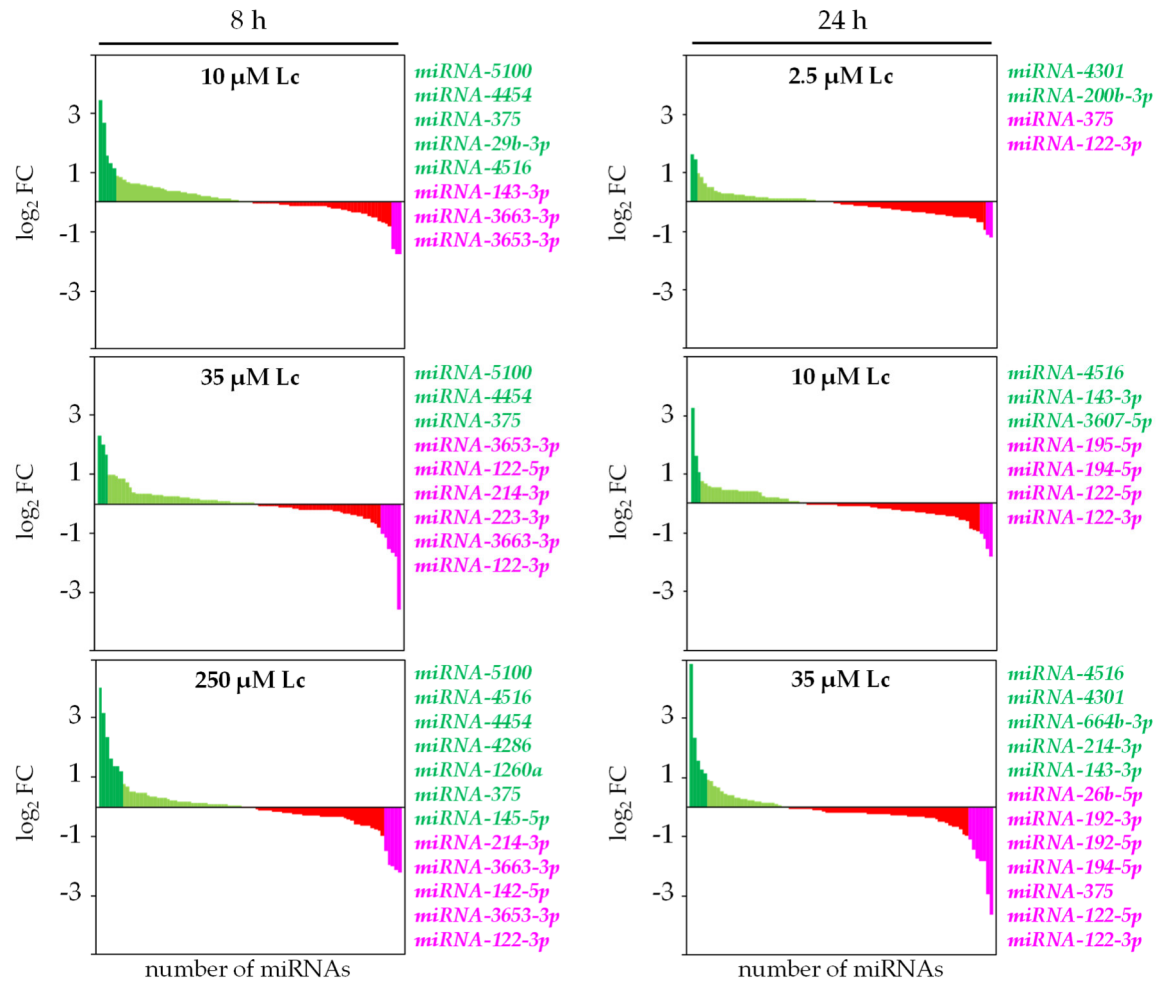

**Figure S1:** miRNA expression profile in differentiated HepaRG cells after exposure to Lc and determined with miRCURY LNA miRNA Array. HepaRG cells were incubated with 10  $\mu$ M, 35  $\mu$ M and 250  $\mu$ M of Lc for 8 h or with 2.5  $\mu$ M, 10  $\mu$ M or 35  $\mu$ M Lc for 24 h, respectively. The results were evaluated using the QIAGEN GeneGlobe miRCURY LNA miRNA PCR Data analysis software. This evaluation is in accordance with the  $2^{-\Delta\Delta C_t}$  method and incorporates additional control such as internal plate calibrator, RNA isolation efficiency spike-in and reverse transcription efficiency spike-in controls. Compared to the control group, the number of deregulated miRNAs above 1 log<sub>2</sub> FC is depicted in dark green and the number of miRNAs below 1 log<sub>2</sub> FC is depicted in pink.

**Table S2:** miRNA expression in differentiated HepaRG cells after exposure to 35  $\mu$ M Sc at 5 different time-points. The results were evaluated according to the  $2^{-\Delta\Delta Ct}$  method. Results of three independent biological replicated are shown as mean and SD in log<sub>2</sub> FC. Statistical analysis was performed using Student's t-test as this is a case of single comparison analysis. That is, each miRNA expression value of one time point was compared to the solvent control (ctrl) of this respective time point. Subsequently, p-values were FDR-adjusted.

|                        | ctrl |      | treatment |      | p-value |
|------------------------|------|------|-----------|------|---------|
| gene names             | mean | SD   | mean      | SD   |         |
| <i>miR-4434_2 h</i>    | 0.00 | 0.00 | 0.06      | 0.29 | 7.6E-01 |
| <i>miR-4434_4 h</i>    | 0.00 | 0.00 | 0.12      | 0.05 | 2.5E-02 |
| <i>miR-4434_6 h</i>    | 0.00 | 0.00 | 0.45      | 0.10 | 3.9E-03 |
| <i>miR-4434_8 h</i>    | 0.01 | 0.00 | 1.54      | 0.40 | 6.3E-03 |
| <i>miR-4434_24 h</i>   | 0.01 | 0.01 | 3.06      | 0.90 | 2.9E-02 |
| <i>miR-4301_2 h</i>    | 0.01 | 0.01 | 0.24      | 0.34 | 5.5E-01 |
| <i>miR-4301_4 h</i>    | 0.02 | 0.01 | 1.09      | 0.58 | 4.4E-02 |
| <i>miR-4301_6 h</i>    | 0.02 | 0.04 | 1.94      | 0.08 | 1.9E-05 |
| <i>miR-4301_8 h</i>    | 0.00 | 0.00 | 3.00      | 1.12 | 1.7E-02 |
| <i>miR-4301_24 h</i>   | 0.01 | 0.01 | 1.80      | 1.22 | 9.0E-02 |
| <i>miR-5100_2 h</i>    | 0.00 | 0.00 | 0.33      | 0.30 | 5.5E-01 |
| <i>miR-5100_4 h</i>    | 0.01 | 0.02 | 2.15      | 0.48 | 5.4E-03 |
| <i>miR-5100_6 h</i>    | 0.03 | 0.06 | 2.58      | 0.73 | 6.8E-03 |
| <i>miR-5100_8 h</i>    | 0.00 | 0.00 | 2.66      | 0.59 | 5.1E-03 |
| <i>miR-5100_24 h</i>   | 0.00 | 0.00 | 1.40      | 1.04 | 9.3E-02 |
| <i>miR-4454_2 h</i>    | 0.01 | 0.01 | 0.38      | 0.45 | 5.5E-01 |
| <i>miR-4454_4 h</i>    | 0.01 | 0.02 | 1.23      | 0.22 | 4.8E-03 |
| <i>miR-4454_6 h</i>    | 0.04 | 0.06 | 1.99      | 0.64 | 8.9E-03 |
| <i>miR-4454_8 h</i>    | 0.00 | 0.00 | 2.50      | 0.50 | 5.1E-03 |
| <i>miR-4454_24 h</i>   | 0.00 | 0.00 | 1.24      | 1.09 | 1.2E-01 |
| <i>miR-223_2 h</i>     | 0.01 | 0.01 | 0.12      | 0.55 | 7.6E-01 |
| <i>miR-223_4 h</i>     | 0.03 | 0.03 | 0.09      | 0.10 | 4.2E-01 |
| <i>miR-223_6 h</i>     | 0.02 | 0.02 | 0.40      | 0.03 | 2.1E-04 |
| <i>miR-223_8 h</i>     | 0.01 | 0.01 | 1.20      | 0.55 | 2.7E-02 |
| <i>miR-223_24 h</i>    | 0.01 | 0.01 | 0.84      | 0.36 | 3.0E-02 |
| <i>miR-3663-3p_2 h</i> | 0.01 | 0.01 | 0.26      | 0.38 | 5.5E-01 |
| <i>miR-3663-3p_4 h</i> | 0.01 | 0.01 | 0.22      | 0.08 | 2.4E-02 |
| <i>miR-3663-3p_6 h</i> | 0.01 | 0.01 | -0.10     | 0.17 | 4.0E-01 |

|                         |      |      |       |      |         |
|-------------------------|------|------|-------|------|---------|
| <i>miR-3663-3p_8 h</i>  | 0.00 | 0.00 | 0.62  | 0.30 | 2.9E-02 |
| <i>miR-3663-3p_24 h</i> | 0.01 | 0.01 | 0.75  | 0.29 | 3.0E-02 |
| <i>miR-122-3p_2 h</i>   | 0.00 | 0.01 | 0.22  | 0.45 | 6.4E-01 |
| <i>miR-122-3p_4 h</i>   | 0.02 | 0.01 | 0.02  | 0.09 | 9.7E-01 |
| <i>miR-122-3p_6 h</i>   | 0.00 | 0.00 | -0.07 | 0.35 | 7.5E-01 |
| <i>miR-122-3p_8 h</i>   | 0.01 | 0.01 | 0.34  | 0.62 | 4.1E-01 |
| <i>miR-122-3p_24 h</i>  | 0.01 | 0.01 | -1.22 | 0.54 | 3.0E-02 |

**Table S3:** Target gene expression in differentiated HepaRG cells after exposure to 35  $\mu$ M of Sc for 5 time points. The results were evaluated according to the  $2^{-\Delta\Delta C_t}$  method. Results are shown as  $\log_2$  FC and as mean and SD of three individual replicates. Statistical analysis was performed using Student's t-test as this is a case of single comparison analysis. That is, each gene expression value of one time point was compared to the solvent control (ctrl) of this respective time point. Subsequently, data were FDR-adjusted.

|                      | ctrl |      | treatment |      | p-value |
|----------------------|------|------|-----------|------|---------|
| gene names           | mean | SD   | mean      | SD   |         |
| <i>RACGAP1_2 h</i>   | 0.00 | 0.00 | -0.50     | 0.67 | 3.5E-01 |
| <i>RACGAP1_4 h</i>   | 0.00 | 0.00 | 0.15      | 0.18 | 2.8E-01 |
| <i>RACGAP1_6 h</i>   | 0.00 | 0.01 | 0.14      | 0.04 | 1.6E-02 |
| <i>RACGAP1_8 h</i>   | 0.01 | 0.01 | 0.27      | 0.09 | 1.3E-02 |
| <i>RACGAP1_24 h</i>  | 0.00 | 0.00 | 2.51      | 0.30 | 7.0E-04 |
| <i>FBXW7_2 h</i>     | 0.10 | 0.16 | 0.20      | 0.57 | 8.1E-01 |
| <i>FBXW7_4 h</i>     | 0.00 | 0.00 | -0.21     | 0.09 | 3.8E-02 |
| <i>FBXW7_6 h</i>     | 0.00 | 0.00 | -0.05     | 0.09 | 4.2E-01 |
| <i>FBXW7_8 h</i>     | 0.00 | 0.01 | 0.22      | 0.04 | 2.0E-03 |
| <i>FBXW7_24 h</i>    | 0.54 | 0.92 | 1.95      | 1.14 | 2.0E-01 |
| <i>CASP2_2 h</i>     | 0.00 | 0.00 | -0.19     | 0.13 | 1.4E-01 |
| <i>CASP2_4 h</i>     | 0.00 | 0.00 | 0.11      | 0.08 | 9.7E-02 |
| <i>CASP2_6 h</i>     | 0.00 | 0.01 | 0.28      | 0.16 | 4.6E-02 |
| <i>CASP2_8 h</i>     | 0.01 | 0.02 | 0.80      | 0.14 | 2.3E-03 |
| <i>CASP2_24 h</i>    | 0.00 | 0.00 | 1.58      | 0.16 | 4.8E-04 |
| <i>SLC25A29_2 h</i>  | 0.00 | 0.01 | 0.10      | 0.21 | 5.6E-01 |
| <i>SLC25A29_4 h</i>  | 0.01 | 0.01 | 0.54      | 0.13 | 6.0E-03 |
| <i>SLC25A29_6 h</i>  | 0.00 | 0.00 | 0.67      | 0.08 | 7.2E-04 |
| <i>SLC25A29_8 h</i>  | 0.00 | 0.00 | 0.60      | 0.15 | 4.3E-03 |
| <i>SLC25A29_24 h</i> | 0.00 | 0.00 | 0.61      | 0.20 | 1.3E-02 |
| <i>REL_2 h</i>       | 0.01 | 0.01 | -0.51     | 0.06 | 2.0E-03 |
| <i>REL_4 h</i>       | 0.00 | 0.00 | 0.15      | 0.19 | 2.8E-01 |
| <i>REL_6 h</i>       | 0.00 | 0.00 | 0.29      | 0.16 | 4.6E-02 |
| <i>REL_8 h</i>       | 0.01 | 0.01 | 0.45      | 0.15 | 1.2E-02 |
| <i>REL_24 h</i>      | 0.01 | 0.01 | 0.26      | 0.06 | 5.4E-03 |
| <i>ATP7A_2 h</i>     | 0.00 | 0.00 | -0.17     | 0.23 | 1.4E-01 |
| <i>ATP7A_4 h</i>     | 0.00 | 0.00 | -0.20     | 0.20 | 4.6E-03 |
| <i>ATP7A_6 h</i>     | 0.00 | 0.00 | -0.16     | 0.09 | 2.4E-02 |



|                     |       |      |       |      |         |
|---------------------|-------|------|-------|------|---------|
| <i>ATP7A_8 h</i>    | 0.00  | 0.01 | -0.43 | 0.23 | 2.1E-02 |
| <i>ATP7A_24 h</i>   | 0.00  | 0.00 | 0.23  | 0.27 | 1.8E-01 |
| <i>PRKAR1A_2 h</i>  | 0.01  | 0.01 | -0.04 | 0.38 | 8.6E-01 |
| <i>PRKAR1A_4 h</i>  | 0.00  | 0.00 | 0.45  | 0.13 | 1.2E-02 |
| <i>PRKAR1A_6 h</i>  | 0.00  | 0.00 | 0.27  | 0.20 | 9.6E-02 |
| <i>PRKAR1A_8 h</i>  | 0.01  | 0.01 | 0.67  | 0.11 | 2.0E-03 |
| <i>PRKAR1A_24 h</i> | 0.00  | 0.00 | 0.20  | 0.16 | 1.4E-01 |
| <i>SFXN1_2 h</i>    | 0.01  | 0.00 | -0.71 | 0.49 | 1.4E-01 |
| <i>SFXN1_4 h</i>    | 0.00  | 0.00 | -0.15 | 0.15 | 2.1E-01 |
| <i>SFXN1_6 h</i>    | 0.00  | 0.01 | -0.02 | 0.15 | 8.1E-01 |
| <i>SFXN1_8 h</i>    | 0.01  | 0.01 | 0.44  | 0.13 | 7.1E-03 |
| <i>SFXN1_24 h</i>   | 0.01  | 0.01 | 0.17  | 0.10 | 7.7E-02 |
| <i>BOK_2 h</i>      | 0.00  | 0.00 | -0.18 | 0.26 | 3.5E-01 |
| <i>BOK_4 h</i>      | 0.00  | 0.00 | -0.03 | 0.08 | 5.7E-01 |
| <i>BOK_6 h</i>      | 0.00  | 0.00 | 0.36  | 0.06 | 2.1E-03 |
| <i>BOK_8 h</i>      | 0.01  | 0.01 | 0.66  | 0.16 | 4.3E-03 |
| <i>BOK_24 h</i>     | 0.00  | 0.00 | 0.12  | 0.07 | 6.2E-02 |
| <i>ATP6V1H_2 h</i>  | 0.02  | 0.02 | -0.80 | 0.52 | 1.4E-01 |
| <i>ATP6V1H_4 h</i>  | -0.08 | 0.15 | -0.22 | 0.12 | 3.5E-01 |
| <i>ATP6V1H_6 h</i>  | 0.01  | 0.01 | -0.41 | 0.15 | 1.8E-02 |
| <i>ATP6V1H_8 h</i>  | 0.03  | 0.02 | 0.08  | 0.22 | 7.2E-01 |
| <i>ATP6V1H_24 h</i> | 0.00  | 0.00 | 0.05  | 0.17 | 6.6E-01 |
| <i>LEPROT_2 h</i>   | 0.00  | 0.00 | -0.15 | 0.11 | 1.4E-01 |
| <i>LEPROT_4 h</i>   | 0.01  | 0.01 | 0.22  | 0.05 | 6.0E-03 |
| <i>LEPROT_6 h</i>   | 0.00  | 0.00 | 0.20  | 0.13 | 6.6E-02 |
| <i>LEPROT_8 h</i>   | 0.01  | 0.01 | 0.41  | 0.08 | 2.6E-03 |
| <i>LEPROT_24 h</i>  | 0.00  | 0.00 | -0.11 | 0.08 | 1.1E-01 |
| <i>IFIH1_2 h</i>    | 0.00  | 0.00 | -0.09 | 0.23 | 5.6E-01 |
| <i>IFIH1_4 h</i>    | 0.02  | 0.04 | -0.26 | 0.18 | 9.7E-02 |
| <i>IFIH1_6 h</i>    | 0.01  | 0.01 | -0.49 | 0.26 | 4.6E-02 |
| <i>IFIH1_8 h</i>    | 0.01  | 0.01 | -0.72 | 0.16 | 3.2E-03 |
| <i>IFIH1_24 h</i>   | 0.00  | 0.00 | -0.11 | 0.16 | 3.0E-01 |
| <i>ACVR2A_2 h</i>   | 0.00  | 0.00 | -0.17 | 0.13 | 3.5E-01 |
| <i>ACVR2A_4 h</i>   | 0.00  | 0.00 | 0.29  | 0.06 | 2.1E-01 |

|                    |      |      |       |      |         |
|--------------------|------|------|-------|------|---------|
| <i>ACVR2A_6 h</i>  | 0.01 | 0.01 | 0.53  | 0.21 | 4.6E-02 |
| <i>ACVR2A_8 h</i>  | 0.00 | 0.00 | 0.45  | 0.20 | 3.7E-02 |
| <i>ACVR2A_24 h</i> | 0.00 | 0.00 | -0.12 | 0.12 | 2.4E-01 |
| <i>STX17_2 h</i>   | 0.01 | 0.01 | -0.47 | 0.24 | 8.0E-02 |
| <i>STX17_4 h</i>   | 0.00 | 0.00 | -0.29 | 0.14 | 4.6E-02 |
| <i>STX17_6 h</i>   | 0.00 | 0.00 | -0.22 | 0.15 | 7.3E-02 |
| <i>STX17_8 h</i>   | 0.00 | 0.00 | -0.12 | 0.13 | 1.8E-01 |
| <i>STX17_24 h</i>  | 0.00 | 0.00 | -0.27 | 0.04 | 1.4E-03 |
| <i>PATZ1_2 h</i>   | 0.00 | 0.00 | -0.25 | 0.09 | 2.7E-02 |
| <i>PATZ1_4 h</i>   | 0.01 | 0.01 | -0.28 | 0.29 | 2.2E-01 |
| <i>PATZ1_6 h</i>   | 0.00 | 0.01 | -0.39 | 0.13 | 1.6E-02 |
| <i>PATZ1_8 h</i>   | 0.00 | 0.00 | -0.41 | 0.23 | 4.4E-02 |
| <i>PATZ1_24 h</i>  | 0.00 | 0.00 | -0.36 | 0.16 | 2.9E-02 |
| <i>PAK1_2 h</i>    | 0.00 | 0.01 | -0.17 | 0.16 | 2.2E-01 |
| <i>PAK1_4 h</i>    | 0.00 | 0.00 | -0.57 | 0.22 | 2.6E-02 |
| <i>PAK1_6 h</i>    | 0.00 | 0.00 | -0.51 | 0.21 | 2.5E-02 |
| <i>PAK1_8 h</i>    | 0.01 | 0.01 | -0.51 | 0.20 | 1.6E-02 |
| <i>PAK1_24 h</i>   | 0.00 | 0.00 | -0.49 | 0.13 | 6.5E-03 |
| <i>FOXO1_2 h</i>   | 0.00 | 0.01 | -0.21 | 0.30 | 3.5E-01 |
| <i>FOXO1_4 h</i>   | 0.00 | 0.00 | -0.51 | 0.10 | 4.5E-03 |
| <i>FOXO1_6 h</i>   | 0.00 | 0.00 | -0.48 | 0.10 | 2.7E-03 |
| <i>FOXO1_8 h</i>   | 0.00 | 0.00 | -0.53 | 0.13 | 3.9E-03 |
| <i>FOXO1_24 h</i>  | 0.00 | 0.01 | -0.68 | 0.25 | 1.7E-02 |
| <i>SLC4A4_2 h</i>  | 0.00 | 0.00 | -0.42 | 0.20 | 7.1E-02 |
| <i>SLC4A4_4 h</i>  | 0.00 | 0.00 | -0.55 | 0.11 | 4.5E-03 |
| <i>SLC4A4_6 h</i>  | 0.00 | 0.01 | -0.78 | 0.15 | 2.7E-03 |
| <i>SLC4A4_8 h</i>  | 0.00 | 0.00 | -0.98 | 0.18 | 2.3E-03 |
| <i>SLC4A4_24 h</i> | 0.00 | 0.00 | -0.70 | 0.10 | 9.5E-04 |
| <i>AOX1_2 h</i>    | 0.00 | 0.00 | -0.54 | 0.11 | 1.2E-02 |
| <i>AOX1_4 h</i>    | 0.00 | 0.01 | -0.74 | 0.07 | 6.3E-04 |
| <i>AOX1_6 h</i>    | 0.00 | 0.00 | -1.10 | 0.21 | 2.7E-03 |
| <i>AOX1_8 h</i>    | 0.00 | 0.00 | -1.31 | 0.13 | 1.5E-03 |
| <i>AOX1_24 h</i>   | 0.00 | 0.00 | -1.87 | 0.31 | 1.4E-03 |
| <i>GAS2_2 h</i>    | 0.00 | 0.00 | -0.10 | 0.04 | 5.7E-02 |

|                     |      |      |       |      |         |
|---------------------|------|------|-------|------|---------|
| <i>GAS2_4 h</i>     | 0.00 | 0.00 | 0.09  | 0.19 | 4.7E-01 |
| <i>GAS2_6 h</i>     | 0.01 | 0.01 | -0.75 | 0.04 | 1.2E-04 |
| <i>GAS2_8 h</i>     | 0.01 | 0.00 | -1.58 | 0.23 | 1.9E-03 |
| <i>GAS2_24 h</i>    | 0.00 | 0.00 | -2.34 | 0.24 | 4.8E-04 |
| <i>ST6GAL1_2 h</i>  | 0.00 | 0.00 | -0.76 | 0.20 | 1.8E-02 |
| <i>ST6GAL1_4 h</i>  | 0.00 | 0.01 | -1.13 | 0.11 | 6.3E-04 |
| <i>ST6GAL1_6 h</i>  | 0.00 | 0.00 | -1.87 | 0.15 | 3.2E-04 |
| <i>ST6GAL1_8 h</i>  | 0.01 | 0.01 | -2.68 | 0.36 | 1.9E-03 |
| <i>ST6GAL1_24 h</i> | 0.00 | 0.00 | -4.84 | 0.11 | 3.3E-06 |

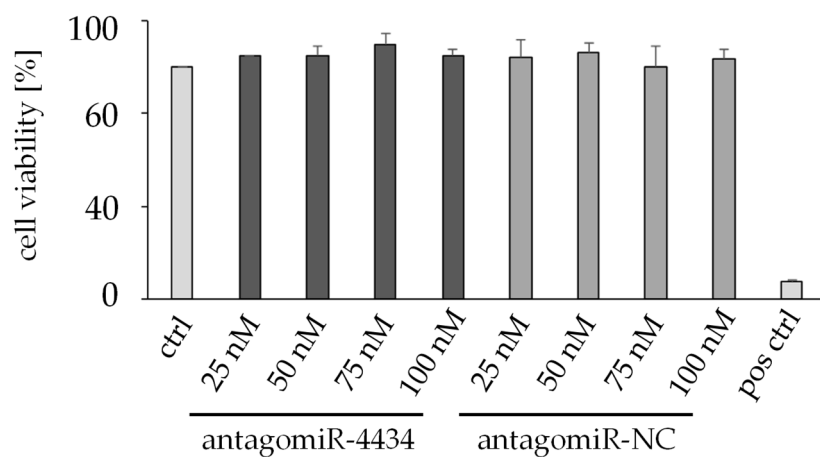

**Figure S2:** Cytotoxicity of differentiated HepaRG cells after antagomiR/antagomiR-NC- and Sc-incubation. Fully differentiated HepaRG cells were incubated with 35  $\mu$ M of Sc and subsequently transiently transfected with 25 nM, 50 nM, 75 nM and 100 nM of antagomiR-4434 or antagomiR-NC, respectively. Cell viability was assessed using the NRU assay and is displayed as percent of solvent control (ctrl; 0.35% ACN and transfection reagent with water) as mean + SD of three independent experiments with five technical replicates each. 0.01% Triton X-100 was used as a positive control (pos ctrl).

|                            | A    |      | B    |      | C    |      | D    |      |                         |
|----------------------------|------|------|------|------|------|------|------|------|-------------------------|
|                            | ctrl | Sc   | ctrl | Sc   | ctrl | Sc   | ctrl | Sc   |                         |
| <i>RACGAP1</i>             | 0.0  | 3.3  | 0.0  | 3.0  | 0.0  | 3.1  | 0.0  | 3.3  | A: 50 nM antagomiR-NC   |
| <i>FBXW7</i>               | 0.0  | 1.4  | 0.0  | 1.3  | 0.0  | 1.5  | 0.0  | 1.5  | B: 50 nM antagomiR-4434 |
| <i>CASP2</i>               | 0.0  | 0.6  | 0.0  | 0.4  | 0.0  | 0.9  | 0.0  | 0.9  | C: 75 nM antagomiR-NC   |
| <i>SLC25A29</i>            | 0.0  | -0.6 | 0.0  | -0.4 | 0.0  | -0.6 | 0.0  | -0.6 | D: 75 nM antagomiR-4434 |
| <i>REL</i>                 | 0.0  | 0.3  | 0.0  | 0.0  | 0.0  | 0.3  | 0.0  | 0.6  |                         |
| <i>ATP7A</i>               | 0.0  | 0.3  | 0.0  | 0.4  | 0.0  | 0.2  | 0.0  | 0.3  |                         |
| <i>PRKAR1A</i>             | 0.0  | -0.1 | 0.0  | 0.1  | 0.0  | 0.1  | 0.0  | 0.4  |                         |
| <i>SFXN1</i>               | 0.0  | 0.0  | 0.0  | -0.3 | 0.0  | 0.0  | 0.0  | 0.2  |                         |
| <i>BOK</i>                 | 0.0  | -0.7 | 0.0  | -0.7 | 0.0  | -0.6 | 0.0  | -0.7 |                         |
| <i>ATP6V1H</i>             | 0.0  | 0.7  | 0.0  | 0.3  | 0.1  | 0.7  | 0.0  | 1.2  |                         |
| <i>LEPROT<sup>1</sup></i>  | 0.0  | -0.9 | 0.0  | -0.8 | 0.0  | -1.0 | 0.0  | -0.7 |                         |
| <i>IFIH1<sup>1</sup></i>   | 0.0  | -0.2 | 0.0  | -0.1 | 0.0  | 0.0  | 0.0  | -0.4 |                         |
| <i>ACVR2A<sup>1</sup></i>  | 0.0  | -0.5 | 0.0  | -0.6 | 0.0  | -0.5 | 0.0  | -0.6 |                         |
| <i>STX17<sup>1</sup></i>   | 0.0  | -0.9 | 0.0  | -0.8 | 0.0  | -1.1 | 0.0  | -0.8 |                         |
| <i>PATZ1<sup>1</sup></i>   | 0.0  | -0.8 | 0.0  | -0.9 | 0.0  | -0.9 | 0.0  | -0.9 |                         |
| ► <i>PAK1<sup>1</sup></i>  | 0.0  | -1.4 | 0.0  | -0.3 | 0.0  | -1.5 | 0.0  | -0.5 |                         |
| <i>FOXO1<sup>1</sup></i>   | 0.0  | -0.8 | 0.0  | -0.6 | 0.0  | -1.0 | 0.0  | -0.6 |                         |
| <i>SLC4A4<sup>1</sup></i>  | 0.0  | -1.5 | 0.0  | -1.6 | 0.0  | -1.3 | 0.0  | -1.8 |                         |
| <i>AOX1<sup>1</sup></i>    | 0.0  | -2.2 | 0.0  | -2.5 | 0.0  | -2.2 | 0.0  | -2.6 |                         |
| <i>GAS2<sup>1</sup></i>    | 0.0  | -2.2 | 0.0  | -1.9 | 0.0  | -3.0 | 0.0  | -2.3 |                         |
| <i>ST6GAL1<sup>1</sup></i> | 0.0  | -5.6 | 0.0  | -4.9 | 0.0  | -6.8 | 0.0  | -5.7 |                         |

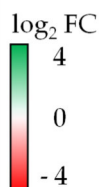

**Figure S3:** Target gene expression in differentiated HepaRG cells after exposure to 35  $\mu$ M Sc and antagomiR-mediated inhibition of miR-4434 after 48 h. The results were evaluated according to the  $2^{-\Delta\Delta C_t}$  method. After housekeeper-normalization, the values of the Sc-treated cells were referred to the respective solvent control (ctrl; 0.35% ACN). Noteworthy, the different treatments (antagomiR-4434 and antagomiR-NC) were referred to their respective solvent controls. AntagomiR/antagomiR-NC treatment was applied in the two concentrations 50 nM and 75 nM. Results are shown as log<sub>2</sub> FC and as mean of three replicates. Upregulation or downregulation of gene expression is indicated in green or red, respectively, with increasing intensity of coloration. Mean values and standard deviations are summarized in the Supplementary Materials Table S4. Superscript number 1 indicates the target genes that show an opposite regulation to their annotated miRNAs. A and B: transfection with 50 nM antagomiR-NC or antagomiR-4434, C and D: transfection with 75 nM antagomiR-NC or antagomiR-4434. Black arrow indicates target gene whose downregulation was significantly attenuated upon miR-4434 inhibition (see Figure 5).

**Table S4:** Target gene expression in differentiated HepaRG cells after exposure to 35  $\mu$ M Sc and antagomiR-mediated inhibition of miR-4434 after 48 h. The results were evaluated according to the  $2^{-\Delta\Delta C_t}$  method and as described above. Results are shown as log<sub>2</sub>FC and as mean and SD of three individual replicates. **(a)** A: Solvent control and Sc-treatment (35  $\mu$ M, 48 h) and transfection with 50 nM antagomiR-NC. B: Solvent control and Sc-treatment (35  $\mu$ M, 48 h) and transfection with 50 nM antagomiR-4434. **(b)** C: Solvent control and Sc-treatment (35  $\mu$ M, 48 h) and transfection with 75 nM antagomiR-NC. D: Solvent control and Sc-treatment (35  $\mu$ M, 48 h) and transfection with 75 nM antagomiR-4434.

| (a)               | (A) solvent control<br>and antagomiR-<br>NC (50 nM) |      | (A) Sc-treatment<br>and antagomiR-<br>NC (50 nM) |      | (B) solvent control<br>and antagomiR-<br>4434 (50 nM) |      | (B) Sc-treatment<br>and antagomiR-<br>4434 (50 nM) |      |
|-------------------|-----------------------------------------------------|------|--------------------------------------------------|------|-------------------------------------------------------|------|----------------------------------------------------|------|
|                   | mean                                                | SD   | mean                                             | SD   | mean                                                  | SD   | mean                                               | SD   |
| <i>gene names</i> |                                                     |      |                                                  |      |                                                       |      |                                                    |      |
| <i>RACGAP1</i>    | 0.01                                                | 0.00 | 3.32                                             | 0.37 | 0.01                                                  | 0.01 | 3.00                                               | 0.16 |
| <i>FBXW7</i>      | 0.00                                                | 0.00 | 1.44                                             | 0.39 | 0.00                                                  | 0.00 | 1.32                                               | 0.18 |
| <i>CASP2</i>      | 0.00                                                | 0.00 | 0.58                                             | 0.28 | 0.01                                                  | 0.01 | 0.37                                               | 0.49 |
| <i>SLC25A29</i>   | 0.00                                                | 0.00 | -0.60                                            | 0.18 | 0.01                                                  | 0.01 | -0.40                                              | 0.09 |
| <i>REL</i>        | 0.01                                                | 0.01 | 0.29                                             | 0.33 | 0.01                                                  | 0.01 | -0.01                                              | 0.18 |
| <i>ATP7A</i>      | 0.02                                                | 0.02 | 0.34                                             | 0.51 | 0.01                                                  | 0.01 | 0.35                                               | 0.07 |
| <i>PRKAR1A</i>    | 0.02                                                | 0.02 | -0.08                                            | 0.57 | 0.02                                                  | 0.03 | 0.13                                               | 0.35 |
| <i>SFXN1</i>      | 0.04                                                | 0.06 | -0.04                                            | 0.53 | 0.00                                                  | 0.01 | -0.27                                              | 0.07 |
| <i>BOK</i>        | 0.00                                                | 0.00 | -0.73                                            | 0.14 | 0.00                                                  | 0.00 | -0.65                                              | 0.07 |
| <i>ATP6V1H</i>    | 0.02                                                | 0.03 | 0.74                                             | 0.71 | 0.04                                                  | 0.08 | 0.29                                               | 0.37 |
| <i>LEPROT</i>     | 0.00                                                | 0.00 | -0.94                                            | 0.55 | 0.00                                                  | 0.00 | -0.84                                              | 0.35 |
| <i>IFIH1</i>      | 0.00                                                | 0.00 | -0.17                                            | 0.27 | 0.02                                                  | 0.01 | -0.09                                              | 0.19 |
| <i>ACVR2A</i>     | 0.01                                                | 0.01 | -0.49                                            | 0.10 | 0.01                                                  | 0.02 | -0.63                                              | 0.30 |
| <i>STX17</i>      | 0.00                                                | 0.00 | -0.89                                            | 0.32 | 0.01                                                  | 0.01 | -0.82                                              | 0.19 |
| <i>PATZ1</i>      | 0.00                                                | 0.00 | -0.84                                            | 0.26 | 0.00                                                  | 0.00 | -0.88                                              | 0.17 |
| <i>PAK1</i>       | 0.00                                                | 0.00 | -1.38                                            | 0.26 | 0.00                                                  | 0.00 | -0.34                                              | 0.79 |
| <i>FOXO1</i>      | 0.00                                                | 0.00 | -0.84                                            | 0.33 | 0.01                                                  | 0.01 | -0.57                                              | 0.05 |
| <i>SLC4A4</i>     | 0.00                                                | 0.01 | -1.54                                            | 0.10 | 0.00                                                  | 0.01 | -1.58                                              | 0.54 |
| <i>AOX1</i>       | 0.00                                                | 0.00 | -2.24                                            | 0.29 | 0.00                                                  | 0.00 | -2.47                                              | 0.47 |
| <i>GAS2</i>       | 0.00                                                | 0.00 | -2.21                                            | 0.36 | 0.01                                                  | 0.01 | -1.94                                              | 0.61 |
| <i>ST6GAL1</i>    | 0.00                                                | 0.00 | -5.55                                            | 0.92 | 0.00                                                  | 0.00 | -4.86                                              | 1.04 |

| (b)               | (C) solvent control<br>and antagomiR-<br>NC (75 nM) |      | (C) Sc-treatment<br>and antagomiR-<br>NC (75 nM) |      | (D) solvent control<br>and antagomiR-<br>4434 (75 nM) |      | (D) Sc-treatment<br>and antagomiR-<br>4434 (75 nM) |      |
|-------------------|-----------------------------------------------------|------|--------------------------------------------------|------|-------------------------------------------------------|------|----------------------------------------------------|------|
|                   | mean                                                | SD   | mean                                             | SD   | mean                                                  | SD   | mean                                               | SD   |
| <i>gene names</i> |                                                     |      |                                                  |      |                                                       |      |                                                    |      |
| <i>RACGAP1</i>    | 0.00                                                | 0.00 | 3.09                                             | 0.44 | 0.00                                                  | 0.00 | 3.32                                               | 0.16 |
| <i>FBXW7</i>      | 0.00                                                | 0.00 | 1.49                                             | 0.39 | 0.00                                                  | 0.00 | 1.51                                               | 0.14 |
| <i>CASP2</i>      | 0.04                                                | 0.06 | 0.95                                             | 0.16 | 0.00                                                  | 0.00 | 0.92                                               | 0.08 |
| <i>SLC25A29</i>   | 0.01                                                | 0.00 | -0.57                                            | 0.09 | 0.00                                                  | 0.00 | -0.56                                              | 0.16 |
| <i>REL</i>        | 0.00                                                | 0.00 | 0.33                                             | 0.37 | 0.01                                                  | 0.02 | 0.56                                               | 0.16 |
| <i>ATP7A</i>      | 0.01                                                | 0.01 | 0.15                                             | 0.29 | 0.00                                                  | 0.00 | 0.32                                               | 0.21 |
| <i>PRKAR1A</i>    | 0.02                                                | 0.02 | 0.05                                             | 0.30 | 0.01                                                  | 0.01 | 0.40                                               | 0.31 |
| <i>SFXN1</i>      | 0.05                                                | 0.04 | 0.00                                             | 0.04 | 0.00                                                  | 0.00 | 0.23                                               | 0.16 |
| <i>BOK</i>        | 0.00                                                | 0.00 | -0.61                                            | 0.19 | 0.00                                                  | 0.01 | -0.71                                              | 0.07 |
| <i>ATP6V1H</i>    | 0.07                                                | 0.08 | 0.74                                             | 0.42 | 0.03                                                  | 0.02 | 1.21                                               | 0.34 |
| <i>LEPROT</i>     | 0.00                                                | 0.00 | -0.98                                            | 0.59 | 0.01                                                  | 0.01 | -0.66                                              | 0.22 |
| <i>IFIH1</i>      | 0.00                                                | 0.00 | 0.05                                             | 1.03 | 0.00                                                  | 0.00 | -0.37                                              | 0.39 |
| <i>ACVR2A</i>     | 0.01                                                | 0.00 | -0.55                                            | 0.14 | 0.00                                                  | 0.00 | -0.59                                              | 0.15 |
| <i>STX17</i>      | 0.01                                                | 0.01 | -1.05                                            | 0.05 | 0.00                                                  | 0.00 | -0.78                                              | 0.26 |
| <i>PATZ1</i>      | 0.00                                                | 0.00 | -0.95                                            | 0.33 | 0.00                                                  | 0.00 | -0.86                                              | 0.12 |
| <i>PAK1</i>       | 0.00                                                | 0.00 | -1.54                                            | 0.08 | 0.00                                                  | 0.00 | -0.48                                              | 0.08 |
| <i>FOXO1</i>      | 0.00                                                | 0.00 | -0.96                                            | 0.32 | 0.00                                                  | 0.00 | -0.58                                              | 0.07 |
| <i>SLC4A4</i>     | 0.01                                                | 0.01 | -1.29                                            | 0.18 | 0.00                                                  | 0.00 | -1.76                                              | 0.35 |
| <i>AOX1</i>       | 0.00                                                | 0.00 | -2.21                                            | 0.13 | 0.00                                                  | 0.00 | -2.58                                              | 0.24 |
| <i>GAS2</i>       | 0.01                                                | 0.01 | -2.95                                            | 0.15 | 0.01                                                  | 0.01 | -2.30                                              | 0.41 |
| <i>ST6GAL1</i>    | 0.00                                                | 0.00 | -6.83                                            | 0.40 | 0.00                                                  | 0.00 | -5.72                                              | 0.98 |
